# Supplementary material for: Investigation of some radiation interaction parameters with aluminum–boron alloys
Source: publisher site journal article supplement (doi:10.1515/ract-2024-0376), 2025-04-13
Supplement: Supplementary file 1 [file j_ract-2024-0376_suppl_001.docx]

**Supplementary Material**

**Investigation of some radiation interaction parameters with Aluminum-Boron alloys**

**Mohamed M.E. Breky1, A. M. Abdelmonem2, M.F. Attallah3***

1Radiation Protection and Safety Department, Hot Laboratories and Waste Management Center, Egyptian Atomic Energy Authority, 13759 Abu Zaabal, Cairo, Egypt

2Reactors Physics Department, Nuclear Research Center, Egyptian Atomic Energy Authority, 13759 Abu Zaabal, Cairo, Egypt

3Analytical Chemistry and Control Department, Hot Laboratories and Waste Management Center, Egyptian Atomic Energy Authority, 13759 Abu Zaabal, Cairo, Egypt

**Corresponding author:**

**Email address:** [dr.m.f.attallah@gmail.com](mailto:dr.m.f.attallah@gmail.com) (M.F. Attallah)

**1. Theoretical background**

**1.1. The gamma-ray interaction parameters**

**1.1.1. Linear and mass attenuation coefficients (µ and MAC)**

The interaction of γ-rays with matter occurs via different physical processes; a physical phenomenon can describe each interaction. The typical interaction types are photo-electric effect (PE), Compton scattering (CS), and pair production (PP). The total interaction of γ-rays can be evaluated by calculating the total attenuation coefficient, which combines the previously mentioned processes. The total attenuation of gamma-rays with a thin target with thickness t follows an exponential behavior, which is easily described by Beer-Lambert law given by [1, 2] as follows:

(1)

(2)

Where Io and I are the final and initial beam intensity, respectively. The μl and μm are the linear and Mass attenuation coefficients, respectively. The symbols x and ρ are represent the thickness and density of the studied material.

**1.1.2. Half value layer (HVL) and tenth value layer (TVL)**

The purpose of any shielding material is to decrease the transmitted gamma radiation intensity to the minimum. So, the calculation of the tenth-value layer (TVL) is mandatory; it was calculated by Singh et al. (2018) using the following expression [3]:

(3)

The half-value-layer (HVL) is the material thickness in (cm) required to decrease the transmitted intensity to its half-value. Singh et al. (2018) [3] calculate the half-value-layer of a shielding material using the following equation:

(4)

**1.1.3. Mean free path**

The mean free path (MFP)or relaxation length is the distance between two successive collisions of gamma-rays passing through a definite thickness (t) of the shielding material and is calculated by Singh et al. (2018) [3] as:

(5)

one means free path (MFP), and the effective atomic number (Zeff) are computed by equations 3, 4, 5, and 6, respectively [4, 5].

**1.1.4. Effective atomic number (Zeff)**

Since the atomic number of a mixture cannot be expressed by a constant atomic number as for an element, another expression called (effective atomic number) Zeff is used to describe the interaction of γ-rays with matter and is energy-dependent. Kavaz et al. (2019) [6] calculate Zeff by the following relation:

(6)

Where, σa and σe represent the atomic and electronic cross-sections of the prepared mixture, respectively. The total atomic cross-section (σa) can be derived from the values of the total mass attenuation coefficient by the following relation:

(7)

and the molecular cross-section σm

(8)

and electronic cross-section σe

(9)

In which NA is Avogadro’s number in (atoms/g), Z*i* and A*i* are the atomic and mass numbers of *i* element in the mixture, n*i* is the number of atoms of the *i*th element present in the mixture, *f*i is the fractional abundance of the *i*th element (μ/ρ)m and (μ/ρ)*i* are the mass-attenuation coefficients of the mixture and the *i*th element in the mixture.

**1.1.5. Transmission factor (TF), radiation protection efficiency (RPE%)**

Transmission factor (TF), and gamma protection efficiency (GPE%) are also computed using the following equations:

(10)

(11)

**1.1.6. Effective electron density (Neff)**

Neff is the number of electrons per unit mass and is related to the effective atomic number by the following:

(12)

Where, the total number of elements content the composite and is the electronic cross-section and given by

**1.1.7. Effective conductivity at 300 K for absorption (Ceff)**

Ceff is another parameter that depends mainly on the Neff and is defined as the following equation:

(13)

Where, me (kg) and e (C) are the electron mass and charge, respectively, and Neff (electrons/kg), τ (s) is the electron relaxation time at Fermi surface (τ = ћ/( KBT)) [4]. Where h (J.s) and KB (k/J) and T (K) are the Planck and Boltzman constants and the absolute temperature, respectively.

**1.1.8. The gamma constant and dose rate** (Dr)

From the computed values of mass energy absorption factor (μen/ρ), which results from the Py-MBLUF software, the gamma constant (Г)is determined using equation (14) [5]:

(14)

Where: Eph is the gamma energy (MeV),

When the gamma source activity is 1Ci and the exposure time for 1h, the dose rate (Dr) at 1 m from the source can be calculated by the following equation [7]:

(R/h) (15)

**1.2. Neutron attenuation parameters:**

Phy-X/PSD calculated fast neutron removal cross-section and macroscopic removal cross-section at 4.5 MeV and MRCScal with a wide range of fast neutrons (2 – 12 MeV) [8, 9]. Additionally, the total macroscopic cross section for thermal neutron (25.4 meV) () was calculated using NGcal software [10]. Many published explained and discussed the neutron attenuation parameters [11-13]. The difference of the fast neutron effective removal cross-section (FNRCS) is a little fixed for neutrons within the fast range energy and can be calculated using the following equation [14]:

**i**(16)

Where *ρi* and are partial density and the mass removal cross-section of the ith component, respectively, for the tested alloy material.

- 1. **Evaluation parameters of charged particles and electrons**

The Bethe-Bloch equation was used to compute total stopping power (TSP) as follows [15]:

For electrons:

(17)

# While TSP for and charged particles:

(18)

Where,

(19)

Where, T is the kinetic energy of the incident projectile, M (kg ) is the rest mass of the projectile, *β* is the *υ/c*, N is the density atomic number (atoms/m3) (*N* = *ρ NA/A*), z is the charge of the incident particle, I (eV) is the mean excitation energy of the material, r0 is the electron radius ( = 2.818 x 10-15*m*) and [16] stopping power (SP) of the tested alloyed material for the electrons is considered mixed between collision SP and radiative SP. However, the SPs of material for and particles are electronic SP and nuclear SP. Moreover, for all charged particles, the TSPs of the tested materials result from the summation of these contributions from sub-interactions. The following equation expresses the TSP for electrons:

(20)

For charged particles ( and TSP is expressed by the equation:

(21)

The mass stopping power, MSP (MeVcm2/g) of a mixture can be determined using the following equation:

(22)

The Rs of charged particles are calculated by equations:

(23)

(24)

In the present work, the calculations of R values of the investigated alloyed samples H+, He2+, Dy3+, Ti4+ and Bi5+ ions were carried out using software in the incident energy range from 0.01 to 100 MeV [17, 18].

**Table S1: Calculated values of HVL for investigated alloys using Phy-X/PSD and Ph-MLBUF software.**

| E (MeV) | S1 | | | S2 | |  | S3 | |  | S4 | |  | S5 | |  | |
| --- | --- | --- | --- | --- | --- | --- | --- | --- | --- | --- | --- | --- | --- | --- | --- | --- |
| **Phy-X/PSD** | **Py-MLBUF** |  | **Phy-X/PSD** | **Py-MLBUF** |  | **Phy-X/PSD** | **Py-MLBUF** |  | **Phy-X/PSD** | **Py-MLBUF** |  | **Phy-X/PSD** | **Py-MLBUF** |  |
| 0.01500 | **0.03215** | **0.03220** | **0.14822** | **0.03598** | **0.03600** | **0.06451** | **0.04070** | **0.04070** | **0.00320** | **0.04668** | **0.04670** | **0.04333** | **0.05448** | **0.05450** | **0.03827** |
| 0.02000 | **0.07431** | **0.07430** | **0.01763** | **0.08291** | **0.08290** | **0.00776** | **0.09345** | **0.09340** | **0.05706** | **0.10669** | **0.10670** | **0.00773** | **0.12378** | **0.12380** | **0.01294** |
| 0.03000 | **0.22670** | **0.22670** | **0.00189** | **0.25029** | **0.25030** | **0.00247** | **0.27860** | **0.27860** | **0.00119** | **0.31315** | **0.31320** | **0.01647** | **0.35623** | **0.35630** | **0.01951** |
| 0.04000 | **0.44996** | **0.45000** | **0.00808** | **0.48971** | **0.48970** | **0.00226** | **0.53597** | **0.53600** | **0.00649** | **0.59042** | **0.59040** | **0.00285** | **0.65539** | **0.65540** | **0.00083** |
| 0.05000 | **0.69478** | **0.69480** | **0.00311** | **0.74521** | **0.74530** | **0.01147** | **0.80216** | **0.80220** | **0.00511** | **0.86691** | **0.86700** | **0.01094** | **0.94111** | **0.94120** | **0.00951** |
| 0.06000 | **0.92068** | **0.92070** | **0.00243** | **0.97536** | **0.97540** | **0.00407** | **1.03558** | **1.03560** | **0.00200** | **1.10217** | **1.10210** | **0.00655** | **1.17615** | **1.17610** | **0.00437** |
| 0.08000 | **1.26764** | **1.26750** | **0.01065** | **1.32089** | **1.32070** | **0.01411** | **1.37770** | **1.37760** | **0.00740** | **1.43842** | **1.43830** | **0.00827** | **1.50342** | **1.50340** | **0.00114** |
| 0.10000 | **1.50084** | **1.50100** | **0.01057** | **1.55009** | **1.55030** | **0.01346** | **1.60183** | **1.60200** | **0.01092** | **1.65621** | **1.65640** | **0.01122** | **1.71344** | **1.71360** | **0.00907** |
| 0.15000 | **1.85552** | **1.85610** | **0.03141** | **1.89980** | **1.90030** | **0.02642** | **1.94570** | **1.94610** | **0.02064** | **1.99330** | **1.99360** | **0.01509** | **2.04269** | **2.04280** | **0.00557** |
| 0.20000 | **2.09130** | **2.09140** | **0.00498** | **2.13539** | **2.13550** | **0.00492** | **2.18095** | **2.18110** | **0.00673** | **2.22804** | **2.22820** | **0.00729** | **2.27672** | **2.27700** | **0.01231** |
| 0.30000 | **2.45415** | **2.45460** | **0.01837** | **2.50154** | **2.50200** | **0.01823** | **2.55042** | **2.55080** | **0.01502** | **2.60083** | **2.60120** | **0.01409** | **2.65286** | **2.65320** | **0.01268** |
| 0.40000 | **2.75729** | **2.75740** | **0.00407** | **2.80881** | **2.80890** | **0.00323** | **2.86191** | **2.86200** | **0.00326** | **2.91665** | **2.91670** | **0.00171** | **2.97311** | **2.97320** | **0.00296** |
| 0.50000 | **3.02869** | **3.02870** | **0.00018** | **3.08447** | **3.08450** | **0.00102** | **3.14194** | **3.14190** | **0.00113** | **3.20117** | **3.20120** | **0.00095** | **3.26225** | **3.26220** | **0.00150** |
| 0.60000 | **3.27829** | **3.27830** | **0.00026** | **3.33827** | **3.33830** | **0.00089** | **3.40006** | **3.40010** | **0.00107** | **3.46375** | **3.46370** | **0.00146** | **3.52941** | **3.52940** | **0.00042** |
| 0.80000 | **3.73893** | **3.73880** | **0.00334** | **3.80689** | **3.80680** | **0.00245** | **3.87691** | **3.87690** | **0.00028** | **3.94907** | **3.94910** | **0.00083** | **4.02346** | **4.02350** | **0.00107** |
| 1.00000 | **4.16167** | **4.16160** | **0.00157** | **4.23687** | **4.23680** | **0.00171** | **4.31434** | **4.31430** | **0.00094** | **4.39417** | **4.39410** | **0.00154** | **4.47646** | **4.47630** | **0.00353** |
| 1.50000 | **5.10894** | **5.10930** | **0.00712** | **5.20196** | **5.20230** | **0.00660** | **5.29778** | **5.29810** | **0.00597** | **5.39654** | **5.39680** | **0.00481** | **5.49836** | **5.49850** | **0.00263** |
| 2.00000 | **5.91564** | **5.91520** | **0.00736** | **6.02754** | **6.02720** | **0.00570** | **6.14290** | **6.14260** | **0.00487** | **6.26185** | **6.26170** | **0.00247** | **6.38457** | **6.38450** | **0.00112** |
| 3.00000 | **7.22379** | **7.22320** | **0.00813** | **7.37722** | **7.37670** | **0.00707** | **7.53576** | **7.53540** | **0.00477** | **7.69964** | **7.69930** | **0.00439** | **7.86911** | **7.86890** | **0.00262** |
| 4.00000 | **8.23445** | **8.23480** | **0.00423** | **8.43197** | **8.43240** | **0.00511** | **8.63674** | **8.63730** | **0.00644** | **8.84914** | **8.84980** | **0.00747** | **9.06954** | **9.07030** | **0.00838** |
| 5.00000 | **9.01824** | **9.01880** | **0.00626** | **9.26048** | **9.26090** | **0.00457** | **9.51262** | **9.51280** | **0.00193** | **9.77520** | **9.77520** | **0.00000** | **10.04881** | **10.04860** | **0.00213** |
| 6.00000 | **9.63232** | **9.63370** | **0.01438** | **9.91771** | **9.91910** | **0.01400** | **10.21600** | **10.21740** | **0.01372** | **10.52796** | **10.52930** | **0.01269** | **10.85446** | **10.85580** | **0.01235** |
| 8.00000 | **10.49511** | **10.49540** | **0.00281** | **10.85970** | **10.86000** | **0.00279** | **11.24388** | **11.24410** | **0.00192** | **11.64912** | **11.64920** | **0.00072** | **12.07698** | **12.07700** | **0.00015** |
| 10.00000 | **11.03263** | **11.03420** | **0.01427** | **11.46389** | **11.46550** | **0.01403** | **11.92169** | **11.92320** | **0.01264** | **12.40831** | **12.40970** | **0.01119** | **12.92629** | **12.92760** | **0.01013** |
| 15.00000 | **11.65446** | **11.65260** | **0.01598** | **12.20484** | **12.20300** | **0.01511** | **12.79754** | **12.79580** | **0.01361** | **13.43724** | **13.43560** | **0.01224** | **14.12934** | **14.12790** | **0.01018** |

**Table S2: Values of Neff for alloy compositions calculated by Phy-X/PSD and Ph-MLBUF software and their derivative percentages.**

| **E (MeV)** | **S1** | |  | **S2** | |  | **S3** | |  | **S4** | |  | **S5** | |  |
| --- | --- | --- | --- | --- | --- | --- | --- | --- | --- | --- | --- | --- | --- | --- | --- |
| **Phy-X/PSD** | **Py-MLBUF** | **Phy-X/PSD** | **Py-MLBUF** | **Phy-X/PSD** | **Py-MLBUF** | **Phy-X/PSD** | **Py-MLBUF** | **Phy-X/PSD** | **Py-MLBUF** |
| **0.01500** | **2.90153E+23** | **2.90150E+23** | **1.16667E-03** | **3.30017E+23** | **3.30011E+23** | **1.84554E-03** | **3.68151E+23** | **3.68150E+23** | **3.17154E-04** | **4.03971E+23** | **4.03970E+23** | **2.03791E-04** | **4.36594E+23** | **0.01500** | **2.90153E+23** |
| **0.02000** | **2.90153E+23** | **2.90150E+23** | **1.16667E-03** | **3.28489E+23** | **3.28481E+23** | **2.36610E-03** | **3.64461E+23** | **3.64460E+23** | **2.07959E-04** | **3.97357E+23** | **3.97350E+23** | **1.66032E-03** | **4.26145E+23** | **0.02000** | **2.90153E+23** |
| **0.03000** | **2.90153E+23** | **2.90150E+23** | **1.16667E-03** | **3.23252E+23** | **3.23241E+23** | **3.27344E-03** | **3.52305E+23** | **3.52290E+23** | **4.21537E-03** | **3.76558E+23** | **3.76540E+23** | **4.76717E-03** | **3.95055E+23** | **0.03000** | **2.90153E+23** |
| **0.04000** | **2.90153E+23** | **2.90150E+23** | **1.16667E-03** | **3.16405E+23** | **3.1641E+23** | **1.45568E-03** | **3.37473E+23** | **3.37460E+23** | **3.87662E-03** | **3.53061E+23** | **3.53040E+23** | **6.00428E-03** | **3.62852E+23** | **0.04000** | **2.90153E+23** |
| **0.05000** | **2.90153E+23** | **2.90150E+23** | **1.16667E-03** | **3.09834E+23** | **3.09831E+23** | **1.01489E-03** | **3.24253E+23** | **3.24240E+23** | **4.11738E-03** | **3.33675E+23** | **3.33660E+23** | **4.39794E-03** | **3.38344E+23** | **0.05000** | **2.90153E+23** |
| **0.06000** | **2.90153E+23** | **2.90150E+23** | **1.16667E-03** | **3.04531E+23** | **3.04521E+23** | **3.26645E-03** | **3.14240E+23** | **3.14220E+23** | **6.43989E-03** | **3.19871E+23** | **3.19850E+23** | **6.58475E-03** | **3.21918E+23** | **0.06000** | **2.90153E+23** |
| **0.08000** | **2.90153E+23** | **2.90150E+23** | **1.16667E-03** | **2.97817E+23** | **2.97821E+23** | **1.43371E-03** | **3.02325E+23** | **3.02340E+23** | **5.00122E-03** | **3.04347E+23** | **3.04370E+23** | **7.56380E-03** | **3.04375E+23** | **0.08000** | **2.90153E+23** |
| **0.10000** | **2.90153E+23** | **2.90150E+23** | **1.16667E-03** | **2.94385E+23** | **2.94381E+23** | **1.19398E-03** | **2.96538E+23** | **2.96530E+23** | **2.62615E-03** | **2.97137E+23** | **2.97130E+23** | **2.22427E-03** | **2.96542E+23** | **0.10000** | **2.90153E+23** |
| **0.15000** | **2.90153E+23** | **2.90150E+23** | **1.16667E-03** | **2.91118E+23** | **2.91091E+23** | **9.34289E-03** | **2.91209E+23** | **2.91170E+23** | **1.33731E-02** | **2.90677E+23** | **2.90630E+23** | **1.61611E-02** | **2.89686E+23** | **0.15000** | **2.90153E+23** |
| **0.20000** | **2.90153E+23** | **2.90150E+23** | **1.16667E-03** | **2.90119E+23** | **2.90121E+23** | **5.84970E-04** | **2.89613E+23** | **2.89620E+23** | **2.49791E-03** | **2.88775E+23** | **2.88790E+23** | **5.33234E-03** | **2.87695E+23** | **0.20000** | **2.90153E+23** |
| **0.30000** | **2.90153E+23** | **2.90150E+23** | **1.16667E-03** | **2.89485E+23** | **2.89471E+23** | **4.68799E-03** | **2.88606E+23** | **2.88590E+23** | **5.70196E-03** | **2.87583E+23** | **2.87570E+23** | **4.45298E-03** | **2.86454E+23** | **0.30000** | **2.90153E+23** |
| **0.40000** | **2.90153E+23** | **2.90150E+23** | **1.16667E-03** | **2.89261E+23** | **2.89261E+23** | **5.06188E-05** | **2.88254E+23** | **2.88250E+23** | **1.28178E-03** | **2.87166E+23** | **2.87160E+23** | **2.22721E-03** | **2.86021E+23** | **0.40000** | **2.90153E+23** |
| **0.50000** | **2.90153E+23** | **2.90150E+23** | **1.16667E-03** | **2.89165E+23** | **2.89161E+23** | **1.33742E-03** | **2.88102E+23** | **2.88100E+23** | **6.64459E-04** | **2.86987E+23** | **2.86980E+23** | **2.59528E-03** | **2.85836E+23** | **0.50000** | **2.90153E+23** |
| **0.60000** | **2.90153E+23** | **2.90150E+23** | **1.16667E-03** | **2.89122E+23** | **2.89121E+23** | **4.68231E-04** | **2.88035E+23** | **2.88030E+23** | **1.71430E-03** | **2.86909E+23** | **2.86900E+23** | **2.97140E-03** | **2.85754E+23** | **0.60000** | **2.90153E+23** |
| **0.80000** | **2.90153E+23** | **2.90150E+23** | **1.16667E-03** | **2.89081E+23** | **2.89081E+23** | **1.22535E-04** | **2.87969E+23** | **2.87970E+23** | **2.58047E-04** | **2.86831E+23** | **2.86840E+23** | **3.08409E-03** | **2.85674E+23** | **0.80000** | **2.90153E+23** |
| **1.00000** | **2.90153E+23** | **2.90150E+23** | **1.16667E-03** | **2.89043E+23** | **2.89041E+23** | **5.21578E-04** | **2.87909E+23** | **2.87900E+23** | **3.20262E-03** | **2.86760E+23** | **2.86760E+23** | **1.58078E-04** | **2.85601E+23** | **1.00000** | **2.90153E+23** |
| **1.50000** | **2.90153E+23** | **2.90150E+23** | **1.16667E-03** | **2.89091E+23** | **2.89081E+23** | **3.41978E-03** | **2.87985E+23** | **2.87980E+23** | **1.86850E-03** | **2.86850E+23** | **2.86840E+23** | **3.53690E-03** | **2.85694E+23** | **1.50000** | **2.90153E+23** |
| **2.00000** | **2.90153E+23** | **2.90150E+23** | **1.16667E-03** | **2.89344E+23** | **2.89351E+23** | **2.50051E-03** | **2.88384E+23** | **2.88390E+23** | **2.06264E-03** | **2.87320E+23** | **2.87330E+23** | **3.41424E-03** | **2.86181E+23** | **2.00000** | **2.90153E+23** |
| **3.00000** | **2.90153E+23** | **2.90150E+23** | **1.16667E-03** | **2.90174E+23** | **2.90181E+23** | **2.33892E-03** | **2.89700E+23** | **2.89710E+23** | **3.41387E-03** | **2.88878E+23** | **2.88890E+23** | **4.04323E-03** | **2.87803E+23** | **3.00000** | **2.90153E+23** |
| **4.00000** | **2.90153E+23** | **2.90150E+23** | **1.16667E-03** | **2.91162E+23** | **2.91161E+23** | **4.62316E-04** | **2.91280E+23** | **2.91280E+23** | **5.33325E-05** | **2.90762E+23** | **2.90770E+23** | **2.81270E-03** | **2.89775E+23** | **4.00000** | **2.90153E+23** |
| **5.00000** | **2.90153E+23** | **2.90150E+23** | **1.16667E-03** | **2.92204E+23** | **2.92191E+23** | **4.36472E-03** | **2.92961E+23** | **2.92950E+23** | **3.81893E-03** | **2.92782E+23** | **2.92770E+23** | **4.25706E-03** | **2.91904E+23** | **5.00000** | **2.90153E+23** |
| **6.00000** | **2.90153E+23** | **2.90150E+23** | **1.16667E-03** | **2.93214E+23** | **2.93211E+23** | **8.68419E-04** | **2.94608E+23** | **2.94600E+23** | **2.66016E-03** | **2.94778E+23** | **2.94770E+23** | **2.57412E-03** | **2.94021E+23** | **6.00000** | **2.90153E+23** |
| **8.00000** | **2.90153E+23** | **2.90150E+23** | **1.16667E-03** | **2.95096E+23** | **2.95091E+23** | **1.81284E-03** | **2.97722E+23** | **2.97710E+23** | **3.99992E-03** | **2.98595E+23** | **2.98590E+23** | **1.72251E-03** | **2.98111E+23** | **8.00000** | **2.90153E+23** |
| **10.00000** | **2.90153E+23** | **2.90150E+23** | **1.16667E-03** | **2.96719E+23** | **2.96711E+23** | **2.55771E-03** | **3.00452E+23** | **3.00440E+23** | **3.92648E-03** | **3.01990E+23** | **3.01980E+23** | **3.46589E-03** | **3.01794E+23** | **10.00000** | **2.90153E+23** |
| **15.00000** | **2.90153E+23** | **2.90150E+23** | **1.16667E-03** | **2.99800E+23** | **2.9981E+23** | **3.32288E-03** | **3.05760E+23** | **3.05770E+23** | **3.12787E-03** | **3.08727E+23** | **3.08740E+23** | **4.15256E-03** | **3.09230E+23** | **15.00000** | **2.90153E+23** |

**Table S3: Values of Ceff for alloy compositions calculated by Phy-X/PSD and Ph-MLBUF software and their derivative percentages.**

| **E (MeV)** | **S1** | |  | **S2** | |  | **S3** | |  | **S4** | |  | **S5** | |  |
| --- | --- | --- | --- | --- | --- | --- | --- | --- | --- | --- | --- | --- | --- | --- | --- |
| **Phy-X/PSD** | **Py-MLBUF** | **Phy-X/PSD** | **Py-MLBUF** | **Phy-X/PSD** | **Py-MLBUF** | **Phy-X/PSD** | **Py-MLBUF** | **Phy-X/PSD** | **Py-MLBUF** |
| **0.01500** | **5.67657E+08** | **5.64150E+08** | **6.17868E-01** | **6.36832E+08** | **6.32890E+08** | **6.18970E-01** | **7.00585E+08** | **6.96260E+08** | **6.17365E-01** | **7.57959E+08** | **7.53280E+08** | **6.17296E-01** | **8.07507E+08** | **8.02520E+08** | **0.01500** |
| **0.02000** | **5.67657E+08** | **5.64150E+08** | **6.17868E-01** | **6.33883E+08** | **6.29960E+08** | **6.18823E-01** | **6.93562E+08** | **6.89280E+08** | **6.17447E-01** | **7.45549E+08** | **7.40940E+08** | **6.18171E-01** | **7.88181E+08** | **7.83310E+08** | **0.02000** |
| **0.03000** | **5.67657E+08** | **5.64150E+08** | **6.17868E-01** | **6.23776E+08** | **6.19910E+08** | **6.19844E-01** | **6.70430E+08** | **6.66270E+08** | **6.20483E-01** | **7.06525E+08** | **7.02130E+08** | **6.22040E-01** | **7.30678E+08** | **7.26120E+08** | **0.03000** |
| **0.04000** | **5.67657E+08** | **5.64150E+08** | **6.17868E-01** | **6.10565E+08** | **6.06790E+08** | **6.18344E-01** | **6.42205E+08** | **6.38220E+08** | **6.20567E-01** | **6.62439E+08** | **6.58310E+08** | **6.23240E-01** | **6.71116E+08** | **6.66940E+08** | **0.04000** |
| **0.05000** | **5.67657E+08** | **5.64150E+08** | **6.17868E-01** | **5.97885E+08** | **5.94190E+08** | **6.17995E-01** | **6.17048E+08** | **6.13220E+08** | **6.20437E-01** | **6.26064E+08** | **6.22170E+08** | **6.22014E-01** | **6.25788E+08** | **6.21900E+08** | **0.05000** |
| **0.06000** | **5.67657E+08** | **5.64150E+08** | **6.17868E-01** | **5.87651E+08** | **5.84000E+08** | **6.21347E-01** | **5.97994E+08** | **5.94270E+08** | **6.22685E-01** | **6.00165E+08** | **5.96420E+08** | **6.23976E-01** | **5.95407E+08** | **5.91700E+08** | **0.06000** |
| **0.08000** | **5.67657E+08** | **5.64150E+08** | **6.17868E-01** | **5.74695E+08** | **5.71160E+08** | **6.15105E-01** | **5.75319E+08** | **5.71800E+08** | **6.11644E-01** | **5.71037E+08** | **5.67560E+08** | **6.08978E-01** | **5.62961E+08** | **5.59530E+08** | **0.08000** |
| **0.10000** | **5.67657E+08** | **5.64150E+08** | **6.17868E-01** | **5.68072E+08** | **5.64560E+08** | **6.18206E-01** | **5.64306E+08** | **5.60810E+08** | **6.19552E-01** | **5.57509E+08** | **5.54060E+08** | **6.18624E-01** | **5.48473E+08** | **5.45080E+08** | **0.10000** |
| **0.15000** | **5.67657E+08** | **5.64150E+08** | **6.17868E-01** | **5.61769E+08** | **5.58250E+08** | **6.26390E-01** | **5.54165E+08** | **5.50670E+08** | **6.30764E-01** | **5.45389E+08** | **5.41940E+08** | **6.32367E-01** | **5.35791E+08** | **5.32400E+08** | **0.15000** |
| **0.20000** | **5.67657E+08** | **5.64150E+08** | **6.17868E-01** | **5.59841E+08** | **5.56390E+08** | **6.16478E-01** | **5.51128E+08** | **5.47740E+08** | **6.14735E-01** | **5.41819E+08** | **5.38510E+08** | **6.10810E-01** | **5.32109E+08** | **5.28850E+08** | **0.20000** |
| **0.30000** | **5.67657E+08** | **5.64150E+08** | **6.17868E-01** | **5.58616E+08** | **5.55140E+08** | **6.22334E-01** | **5.49213E+08** | **5.45790E+08** | **6.23253E-01** | **5.39583E+08** | **5.36230E+08** | **6.21472E-01** | **5.29814E+08** | **5.26520E+08** | **0.30000** |
| **0.40000** | **5.67657E+08** | **5.64150E+08** | **6.17868E-01** | **5.58185E+08** | **5.54740E+08** | **6.17236E-01** | **5.48542E+08** | **5.45150E+08** | **6.18310E-01** | **5.38802E+08** | **5.35470E+08** | **6.18420E-01** | **5.29014E+08** | **5.25750E+08** | **0.40000** |
| **0.50000** | **5.67657E+08** | **5.64150E+08** | **6.17868E-01** | **5.58000E+08** | **5.54550E+08** | **6.18196E-01** | **5.48253E+08** | **5.44870E+08** | **6.17024E-01** | **5.38466E+08** | **5.35130E+08** | **6.19594E-01** | **5.28671E+08** | **5.25400E+08** | **0.50000** |
| **0.60000** | **5.67657E+08** | **5.64150E+08** | **6.17868E-01** | **5.57917E+08** | **5.54470E+08** | **6.17922E-01** | **5.48125E+08** | **5.44730E+08** | **6.19456E-01** | **5.38318E+08** | **5.34980E+08** | **6.20121E-01** | **5.28519E+08** | **5.25250E+08** | **0.60000** |
| **0.80000** | **5.67657E+08** | **5.64150E+08** | **6.17868E-01** | **5.57837E+08** | **5.54390E+08** | **6.17924E-01** | **5.48000E+08** | **5.44620E+08** | **6.16862E-01** | **5.38173E+08** | **5.34870E+08** | **6.13753E-01** | **5.28371E+08** | **5.25120E+08** | **0.80000** |
| **1.00000** | **5.67657E+08** | **5.64150E+08** | **6.17868E-01** | **5.57763E+08** | **5.54320E+08** | **6.17361E-01** | **5.47886E+08** | **5.44490E+08** | **6.19866E-01** | **5.38040E+08** | **5.34720E+08** | **6.17129E-01** | **5.28235E+08** | **5.24980E+08** | **1.00000** |
| **1.50000** | **5.67657E+08** | **5.64150E+08** | **6.17868E-01** | **5.57857E+08** | **5.54390E+08** | **6.21445E-01** | **5.48031E+08** | **5.44640E+08** | **6.18777E-01** | **5.38209E+08** | **5.34870E+08** | **6.20333E-01** | **5.28407E+08** | **5.25120E+08** | **1.50000** |
| **2.00000** | **5.67657E+08** | **5.64150E+08** | **6.17868E-01** | **5.58345E+08** | **5.54910E+08** | **6.15167E-01** | **5.48790E+08** | **5.45420E+08** | **6.14034E-01** | **5.39091E+08** | **5.35780E+08** | **6.14112E-01** | **5.29309E+08** | **5.26060E+08** | **2.00000** |
| **3.00000** | **5.67657E+08** | **5.64150E+08** | **6.17868E-01** | **5.59947E+08** | **5.56500E+08** | **6.15640E-01** | **5.51294E+08** | **5.47910E+08** | **6.13863E-01** | **5.42014E+08** | **5.38690E+08** | **6.13285E-01** | **5.32309E+08** | **5.29040E+08** | **3.00000** |
| **4.00000** | **5.67657E+08** | **5.64150E+08** | **6.17868E-01** | **5.61854E+08** | **5.58380E+08** | **6.18320E-01** | **5.54300E+08** | **5.50880E+08** | **6.17066E-01** | **5.45548E+08** | **5.42200E+08** | **6.13705E-01** | **5.35956E+08** | **5.32660E+08** | **4.00000** |
| **5.00000** | **5.67657E+08** | **5.64150E+08** | **6.17868E-01** | **5.63864E+08** | **5.60360E+08** | **6.21365E-01** | **5.57500E+08** | **5.54040E+08** | **6.20621E-01** | **5.49339E+08** | **5.45930E+08** | **6.20623E-01** | **5.39894E+08** | **5.36540E+08** | **5.00000** |
| **6.00000** | **5.67657E+08** | **5.64150E+08** | **6.17868E-01** | **5.65812E+08** | **5.62310E+08** | **6.18976E-01** | **5.60634E+08** | **5.57160E+08** | **6.19568E-01** | **5.53083E+08** | **5.49660E+08** | **6.18844E-01** | **5.43809E+08** | **5.40450E+08** | **6.00000** |
| **8.00000** | **5.67657E+08** | **5.64150E+08** | **6.17868E-01** | **5.69445E+08** | **5.65920E+08** | **6.19107E-01** | **5.66560E+08** | **5.63040E+08** | **6.21211E-01** | **5.60245E+08** | **5.56780E+08** | **6.18566E-01** | **5.51375E+08** | **5.47950E+08** | **8.00000** |
| **10.00000** | **5.67657E+08** | **5.64150E+08** | **6.17868E-01** | **5.72576E+08** | **5.69030E+08** | **6.19289E-01** | **5.71754E+08** | **5.68200E+08** | **6.21676E-01** | **5.66616E+08** | **5.63100E+08** | **6.20533E-01** | **5.58186E+08** | **5.54720E+08** | **10.00000** |
| **15.00000** | **5.67657E+08** | **5.64150E+08** | **6.17868E-01** | **5.78522E+08** | **5.74950E+08** | **6.17461E-01** | **5.81857E+08** | **5.78290E+08** | **6.12987E-01** | **5.79256E+08** | **5.75710E+08** | **6.12154E-01** | **5.71939E+08** | **5.68430E+08** | **15.00000** |

**References**

[1] Mansy M.S., Lasheen Y.F., Breky M.M. and Selim Y. Experimental and theoretical investigation of Pb–Sb alloys as a gamma-radiation shielding material. *Radiat. Phys. Chem*. 2021, 183, 109416.

[2] Limkitjaroenporn P., Kaewkhao J., Limsuwan P. and Chewpraditkul W. Physical, optical, structural and gamma-ray shielding properties of lead sodium borate glasses. *J. Phys. Chem. Solids*. 2011, 72, 245.

[3] Singh T., Kaur A., Sharma J. and Singh P.S. Gamma rays’ shielding parameters for some Pb-Cu binary alloys. *Eng. Sci. Technol.* 2018, 21, 1078.

[4] Abdelmonem A. and Farrag E.A. An investigation of some ionizing radiation interaction parameters in selected composite scintillation materials.*Radiat. Eff. Defects Solids***,** 2024, 179, 329.

[5] Rafiei M.M., Parsaei S., Kaur P., Singh K., Büyükyıldız M. and Kurudirek M. A Monte Carlo investigation of some important radiation parameters and tissue equivalency for photons below 1 keV in human tissues. *Biomed. Phys. Eng. Express*. 2022, 8, 025002.

[6] Kavaz E., Tekin H., Kilic G. and Susoy G. Newly developed Zinc-Tellurite glass system: an experimental investigation on impact of Ta2O5 on nuclear radiation shielding ability. *J Non-Cryst Solids*. 2020, 544, 120169.

[7] Devillers M. Lifetime of electrons in metals at room temperature. *Solid State Commun.,* 1984, 49, 1019.

[8] El-Samrah M., El-Mohandes A., El-Khayatt A. and Chidiac S. MRCsC: A user-friendly software for predicting shielding effectiveness against fast neutrons. *Radiat. Phys. Chem.,* 2021, 182, 109356.

[9] Şakar E., Özpolat Ö.F., Alım B., Sayyed M. and Kurudirek M. Phy-X/PSD: development of a user friendly online software for calculation of parameters relevant to radiation shielding and dosimetry. *Radiat. Phys. Chem.* 2020, 166, 108496.

[10] Gökçe H., Güngör O. and Yılmaz H. An online software to simulate the shielding properties of materials for neutrons and photons: NGCal. *Radiat. Phys. Chem.* 2021, 185, 109519.

[11] Osman A. Analysis of radiation shielding effectiveness of hydride and borohydride metals for nuclear industry. *International Journal of Advanced Nuclear Reactor Design and Technology*. 2023;5:30-43.

[12] Abdelmonem A., Echeweozo E. and Igwesi D. Evaluation of shielding and interaction properties of different stainless steel alloys for nuclear power plant shielding. *Radiat. Eff. Defects Solids*. 2024, 1.

[13] Abdelmonem A. and Echeweozo E. Investigation of interaction parameters of gamma radiation, neutron and charge particles in selected thermoplastic polymers for radiation protection. *J. Mater. Sci.-Mater. Electron*. 2023, 34, 365.

[14] Agostinelli S., Allison J., Amako K.a, Apostolakis J., Araujo H., Arce P., Asai M., Axen D., Banerjee S. and Barrand G. GEANT4-a simulation toolkit. *Nucl. Instrum. Methods Phys. Res. Sect. A-Accel. Spectrom. Dect. Assoc. Equip*. 2003, 506, 250.

[15] Al-Buriahi M., Alrowaili Z., Eke C., Alomairy S., Alshahrani B., Bejaoui I. and Sriwunkum C. An important role of Ba2+, Sr2+, Mg2+, and Zn2+ in the radiation attenuation performance of CFCBPC bioactive glasses. *J. Aust. Ceram. Soc*. 2022, 58, 461.

[16] Adeli R., Shirmardi S.P. and Ahmadi S.J. Neutron irradiation tests on B4C/epoxy composite for neutron shielding application and the parameters assay. *Radiat. Phys. Chem.,* 2016, 127, 140.

[17] Ziegler J.F. and Biersack J.P. The stopping and range of ions in matter *Treatise on heavy-ion science: volume 6: astrophysics, chemistry, and condensed matter*: Springer; 1985, 93-129.

[18] Ziegler J.F., Ziegler M.D. and Biersack J.P. SRIM–The stopping and range of ions in matter (2010). *Nucl. Instrum. Methods Phys. Res. Sect. B-Beam Interact. Mater. Atoms*. 2010, 268, 1818.
